# Supplementary material for: Taf1 knockout is lethal in embryonic male mice and heterozygous females show weight and movement disorders
Source: PubMed Central journal article supplement (PMC11261634; doi:10.1242/dmm.050741), 2024-07-10
Supplement: dmm-17-050741-s1.pdf [file dmm-17-050741-s1.pdf]

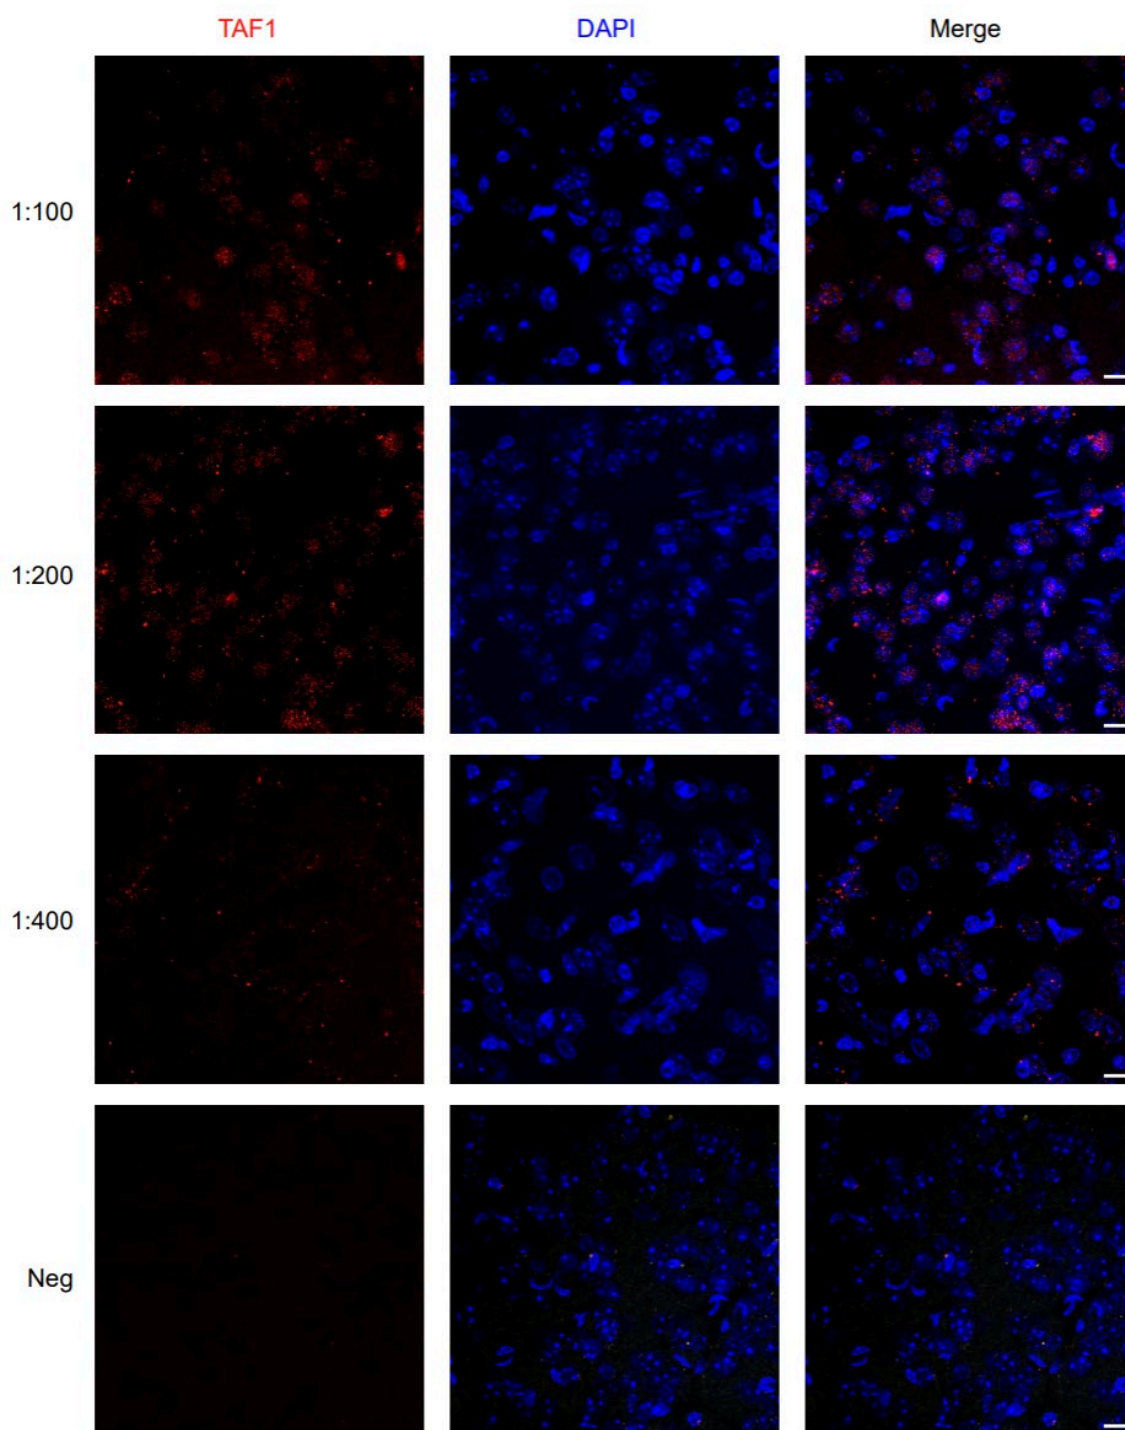

**Fig. S1. Optimisation of dilutions for TAF1 antibody.** TAF1 staining was optimised in the striatum with serial dilutions of primary antibody (1:100, 1:200, 1:400). The same concentration of secondary antibody (1:400), DAPI, and exposure for imaging was used for all sections. The negative control section (neg) was stained with DAPI and secondary antibody, with omission of only primary antibody. One section per antibody condition was used (N=1), where all sections came from the same Wt mouse sample. The experiment was repeated twice with reproducible results. This was not a quantitative experiment.

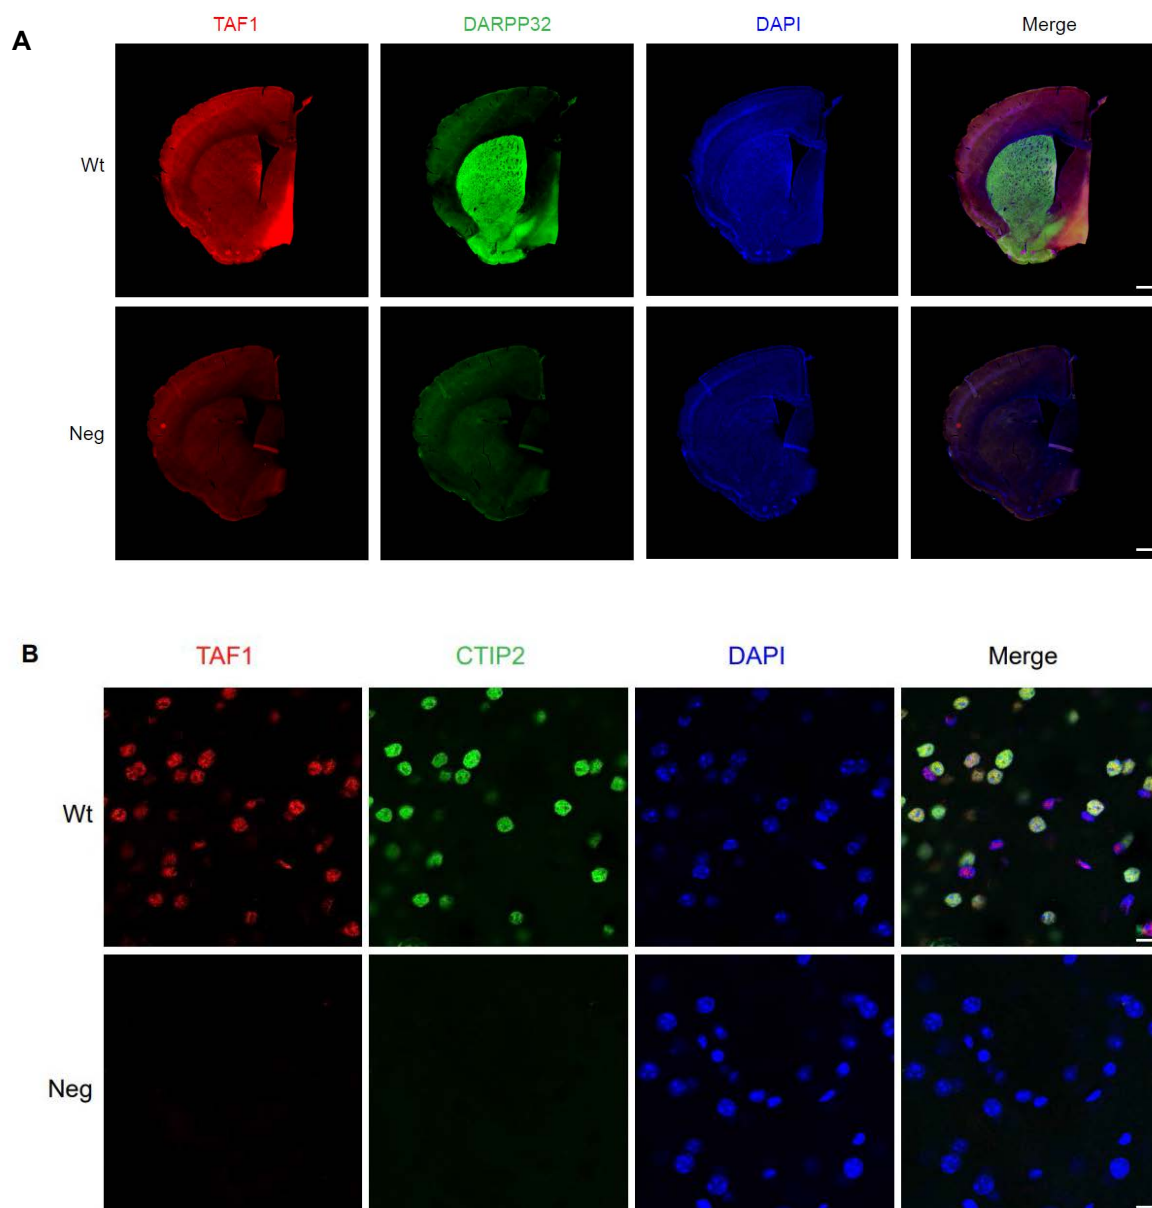

**Fig. S2. TAF1 expression in mouse brain with negative controls.** Immunostaining is shown for female mice of 3-5 months old, for wild-type (Wt) mice. **(A)** TAF1 (red) is co-stained with DARPP32 (green) which indicates medium spiny neurons (MSNs) in the striatum, and DAPI (blue) was used to stain all nuclei. Scale bar, 500  $\mu$ m. **(B)** CTIP2 antibody (green) was used to co-stain medium spiny neuron (MSN) nuclei and DAPI (blue) was used to stain all nuclei. Negative control sections (neg) were stained with DAPI and secondary antibodies, with omission of only primary antibodies. One section per antibody condition was used (N=1), where all sections came from the same Wt mouse sample. The experiment was repeated twice with reproducible results. This was not a quantitative experiment.

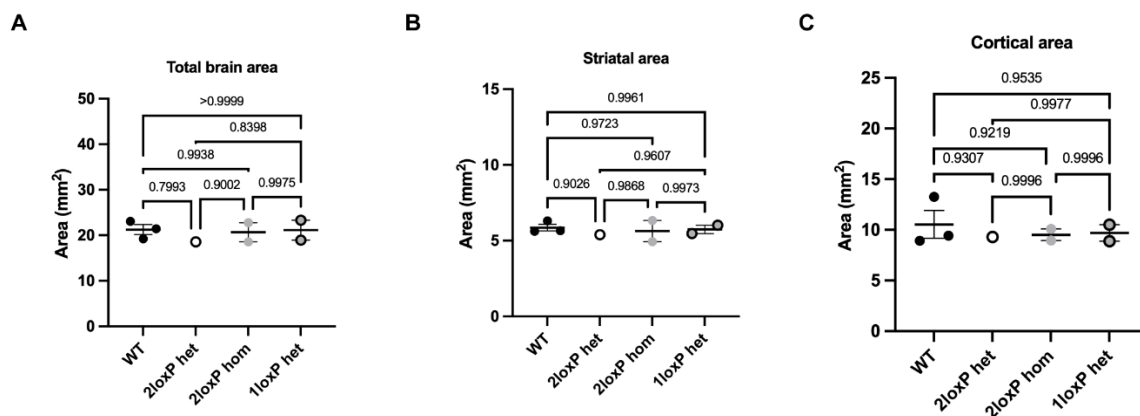

**Fig. S3. Quantification of brain size from coronal sections.** From serial sections of those in Figure 6, (A) total brain area, (B) striatal area, and (C) cortical area, were measured using H&E staining to identify brain regions. Each dot represents one replicate section from the same mouse (Wt, N=3; 2loxP het, N=1; 2loxP hom, N=2; 1loxP het, N=2). The experiment was not repeated. All groups were compared by one-way ANOVA, where Tukey’s multiple comparison test was used to compare groups. Error bars show mean  $\pm$  SEM, and P-values are indicated.

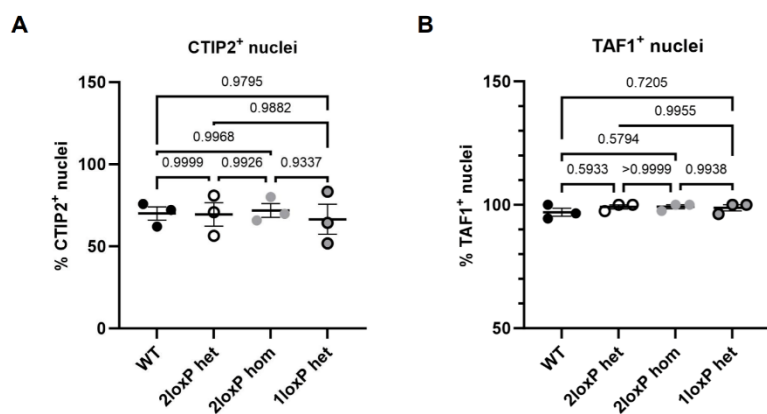

**Fig. S4. Quantification of TAF1 expression in nuclei in striatum.** From Figure 7, number of (A) CTIP2-positive and (B) TAF1-positive nuclei were counted, expressed as a percentage of the total nuclei labelled by DAPI staining. Each dot represents one sample from one mouse (n=3 mice/genotype). The experiment was not replicated. All groups were compared by one-way ANOVA, where Tukey’s multiple comparison test was used to compare groups. Error bars show mean  $\pm$  SEM, and P-values are indicated.

**Table S1. Guides and templates for CRISPR reactions**

| Method                 | Nucleic Acid | Name     | Sequence                                                                                                                                                                                                                                                                                                                                                                                                                                                                                                                                                                                                                                                                                                                                                                                                                                                                                                                                                                                                                                                                                   |
|------------------------|--------------|----------|--------------------------------------------------------------------------------------------------------------------------------------------------------------------------------------------------------------------------------------------------------------------------------------------------------------------------------------------------------------------------------------------------------------------------------------------------------------------------------------------------------------------------------------------------------------------------------------------------------------------------------------------------------------------------------------------------------------------------------------------------------------------------------------------------------------------------------------------------------------------------------------------------------------------------------------------------------------------------------------------------------------------------------------------------------------------------------------------|
| Cytoplasmic injection  | RNA guide    | cgEMS23  | CTCCCTAGTGCTGAGAACAG                                                                                                                                                                                                                                                                                                                                                                                                                                                                                                                                                                                                                                                                                                                                                                                                                                                                                                                                                                                                                                                                       |
|                        | RNA guide    | cgEMS30  | GCGCCACCACGCCAGGCATG                                                                                                                                                                                                                                                                                                                                                                                                                                                                                                                                                                                                                                                                                                                                                                                                                                                                                                                                                                                                                                                                       |
|                        | DNA template | oEMS6395 | GTCTCTCTGTAGCACTGGCTGTCCCAGAATTCATTC<br>TATAGGTTAGGCTGACCTCAAATTCATAGAGATCAG<br>CCTGCCTCTGCCTCCCTAGTGCTGAGAAATAACTTC<br>GTATAGCATAATTATACGAAGTTATCAGAGGCAAG<br>AACCACCACTGCCAGCTAAGCACAGTATTTTTTAT<br>TTAACCTGGTTGAGAAAAAATTATAACATGATAAA<br>TATAAAGTGCCTTTATGAACAAAAAATGAAAAAA<br>AATCAGAGATTAGATTTGAAGCATTTCACCTTCTCT<br>CAGAAGCTTAAAAGAGCACAAAGTAGGATTACTTATA<br>ATGACGGAGATAAAAGCCTGGATGTTAGATATTCCT<br>GGCATAGAAGCACACCTTGCTGCACATTGTAGGCCA<br>TGGCATTCCCTAGTCATACTGGAAGGAAGCCAGCCTG<br>CCAAACTCGCACGCTGAGGTTTTGTTCTTTGTGTT<br>TGACATCCTCCCCATCCCAAATGATATCATCTTCCC<br>AATGCAGCTGTGTCACCATTAGGAAGTTTTTCATCTG<br>CCAGAAGATCGACGCCACTGTTTTCTCAAGTTTCC<br>TTAATTTCTGTGTAAGTAGAAAGAAGAATCAACCAG<br>TCAGTCACTAATCAAAGGTCCCAATGCAGATCCTAA<br>ATGACTCAGGAAGTGGTGCTTTTCCAGGCTTAGTGT<br>CAAATACCTGCAGTGCTAACACTTGCGAGACTGAAA<br>GGAGAATTCCAAGTCTGAAGTCAGCCCAGGATACAA<br>AGTGTGACTCTGTTTCAAAGCCAAGGATTGGCAAT<br>GTAGCTCAGTGATAAGAGCTTCCCCATATAACTTCG<br>TATAGCATAATTATACGAAGTTATGCCTGGCGTGG<br>TGGCGCACGCCTTAAATCCCAGCACTCGGGAGGCAG<br>AGGCAGGAGGATTTCTGAGTTTAAGGCCAGCCTAGT<br>CTACAAAGTGAGTTCC |
| iGONAD electroporation | RNA guide    | cgEMS39  | TTCACCAACTCTGAGGTCAG                                                                                                                                                                                                                                                                                                                                                                                                                                                                                                                                                                                                                                                                                                                                                                                                                                                                                                                                                                                                                                                                       |
|                        | DNA template | oEMS6414 | AGGGAAATCTTTTCTCAAAAATCCAATAAATCAAGG<br>TGACTTTTAAATATGCCCCCTCTGATAACTTCGTAT<br>AGCATAATTATACGAAGTTATACCTCAGAGTTGGT<br>GAAAGGGTTATCAAGATCACCAAGAATAATTTAGAG<br>GTTGCGGGGC                                                                                                                                                                                                                                                                                                                                                                                                                                                                                                                                                                                                                                                                                                                                                                                                                                                                                                                  |

**Table S2. Primers used for genotyping mice**

| Target                                         | Name                    | Forward primer                | Name                    | Reverse primer                  | Amplicon size                                        |
|------------------------------------------------|-------------------------|-------------------------------|-------------------------|---------------------------------|------------------------------------------------------|
| <i>Taf1</i> 2loxP<br>(5' loxP size difference) | oEMS<br>6445            | TGACTCCTAG<br>GTCTTGACA       | oEMS<br>6446            | AGGAAGTGGT<br>GCTTTTCCAG        | 354 bp<br>(no loxP)<br>388 bp<br>(with loxP)         |
| <i>Taf1</i> 2loxP<br>(5' loxP specific)        | oEMS<br>6443            | CACGCCAGGCAT<br>AACTTCGTATAAT | oEMS<br>6444            | GCTTTGTTTG<br>GCTAGTTGGTT       | 896 bp                                               |
| <i>Taf1</i> 2loxP<br>(3' loxP size difference) | oEMS<br>6447            | CAGGCTTCCTA<br>AGTACTACAAT    | oEMS<br>6448            | CTCAAAAATCCAA<br>TAAATCAAGGTGAC | 362 bp<br>(no loxP)<br>396 bp<br>(with loxP)         |
| <i>Taf1</i> 2loxP<br>(3' loxP specific)        | oEMS<br>6447            | CAGGCTTCCTA<br>AGTACTACAAT    | oEMS<br>6449            | TATGCCCCCT<br>CTGATAACTTC       | 362 bp                                               |
| <i>Taf1</i> 1loxP<br>(recomb.)                 | oEMS<br>6476            | TAGGTCTTGC<br>ACATGTTGGG      | oEMS<br>6477            | AGGCAAGACT<br>GAAACATGCA        | 361 bp<br>(with recomb.)<br>1,885 bp<br>(no recomb.) |
| <i>Cre</i> (JAX Protocol)                      | oIMR<br>1084            | GCGGTCTGGCA<br>GTAAAACTATC    | oIMR<br>1085            | GTGAAACAGCA<br>TTGCTGTCACTT     | 100 bp                                               |
| Sex<br>(PMID<br>15945368)                      | Forward<br><i>Kdm5c</i> | CTGAAGCTTT<br>TGGCTTTGAG      | Reverse<br><i>Kdm5c</i> | CCACTGCCA<br>AATTCTTTGG         | 302 bp<br>(Y Chrom.)<br>331 bp<br>(X Chrom.)         |

JAX, The Jackson Laboratory, Bar Harbor, ME; PMID, Pubmed Identifier

**Table S3. Primers used for Samplix sequencing**

| Target              | Name           | Forward primer               | Name           | Reverse primer              | Assay type     |
|---------------------|----------------|------------------------------|----------------|-----------------------------|----------------|
| Upstream of 5' loxP | WO100017_Up_1F | ACTTTTGTGGTC<br>TGAACTTAGCAC | WO100017_Up_1R | GAACATTCTT<br>CCCCGGTCCA    | dPCR<br>main   |
| Upstream of 5' loxP | WO100017_Up_3F | AACTTGTCCCT<br>GTTGGTGGCT    | WO100017_Up_3R | CCAATTTGTGAG<br>ATCTGCAGAGC | qPCR<br>main   |
| Upstream of 5' loxP | WO100017_Dn_5F | ATGGACGTTG<br>GGAGGACAAT     | WO100017_Dn_5R | CTCCTGCCATC<br>AACATACCCA   | dPCR<br>backup |
| Upstream of 5' loxP | WO100017_Dn_6F | AGCTGCCAGTT<br>TTTAGTGTTTG   | WO100017_Dn_6R | CACTACTGCC<br>CAAGCCATGT    | qPCR<br>backup |

dPCR, fluorescent in-droplet PCR; main, assay used in all cases; qPCR, quantitative PCR; backup, assay used in cases of DNA degradation

**Table S4. Primers used for quantitative RT-PCR.**

| Target                         | Forward primer        | Reverse primer         |
|--------------------------------|-----------------------|------------------------|
| <i>Taf1</i> Exon 7             | CACAATGATGGCTCCTGTGGA | AAGCCACTGCCATCTTCAGG   |
| <i>Taf1</i> Exon 8             | AGGAAAACAGTGGCGTCGAT  | TGACATCCTCCCCATCCCAA   |
| <i>Taf1</i> Exon 34            | AGTCTGGACCCAATGACTCC  | AGCATCTCGAGAAACACTGAGG |
| <i>Taf1</i> Exon 34'           | GGCTAAGCCTCCTGATTTGT  | CAAGACAGACAGATTGCTCTCA |
| <i>Taf1</i> Exon 38            | CCAGTTGGCACTTGAGACTCA | GGGTGGGAGGGAGATGAAGA   |
| $\beta$ -actin ( <i>Actb</i> ) | AGAAAATCTGGCACCACACC  | AGAGGCGTACAGGGATAGCA   |

**Table S5. Antibodies used for immunofluorescent staining (IF) and western blot (WB). Dilutions used are described in the materials and methods section.**

| Category  | Target [clone]                                     | Company                                                                   | Catalogue no.                          | Batch no.   | Application |
|-----------|----------------------------------------------------|---------------------------------------------------------------------------|----------------------------------------|-------------|-------------|
| Primary   | TAF1 [177-4] *<br>(rabbit monoclonal)              | Timmers Lab<br>supported by<br>CCXDP<br>(Capponi <i>et al.</i><br>(2020)) | N/A (not<br>commercially<br>available) | N/A         | IF/WB       |
| Primary   | CTIP2 [25B6]<br>(rat monoclonal)                   | Abcam                                                                     | ab18465                                | 2101032938  | IF          |
| Primary   | DARPP-32 [H-3]<br>(mouse monoclonal)               | Santa Cruz<br>Biotechnology                                               | sc-271111                              | 1021        | IF          |
| Secondary | Anti-rat IgG (H+L)<br>Alexa Fluor 488              | Thermo Fisher                                                             | A-11006                                | 2551392     | IF          |
| Secondary | Anti-mouse IgG (H+L)<br>Alexa Fluor 488            | Thermo Fisher                                                             | A-11001                                | 2551357     | IF          |
| Secondary | Anti-rabbit IgG (H+L)<br>Alexa Fluor 564           | Thermo Fisher                                                             | A-11035                                | 2387450     | IF          |
| Primary   | $\beta$ -tubulin [EPR16774]<br>(rabbit monoclonal) | Abcam                                                                     | ab179513                               | GR3214136-5 | WB          |
| Primary   | $\alpha$ -actinin [H-2]<br>(mouse monoclonal)      | Santa Cruz                                                                | sc-17829                               | L2921       | WB          |
| Secondary | Anti-rabbit IgG (H+L)<br>IRDye 800CW               | LI-COR                                                                    | 926-32211                              | D10512-05   | WB          |
| Secondary | Anti-mouse IgG (H+L)<br>IRDye 680LT                | LI-COR                                                                    | 926-68020                              | D11005-15   | WB          |

\* Validation of this TAF1-specific monoclonal antibody has been published in Capponi *et al.* (2020). The epitope is TPGPYTPQPPDLY derived from peptides encoded by exons 34 and 35 of mouse *Taf1* (*Taf1*-201 and *Taf1*-202).
